# Supplementary material for: Atomic Simulation of the Binding of JAK1 and JAK2 with the Selective Inhibitor Ruxolitinib
Source: MDPI journal article supplement (doi:10.3390/ijms231810466), 2022-09-09
Supplement: s1 [file s1]

## Supplementary Materials

### Figures

**Figure S1.** JAK1: ligand binding site with decernotinib

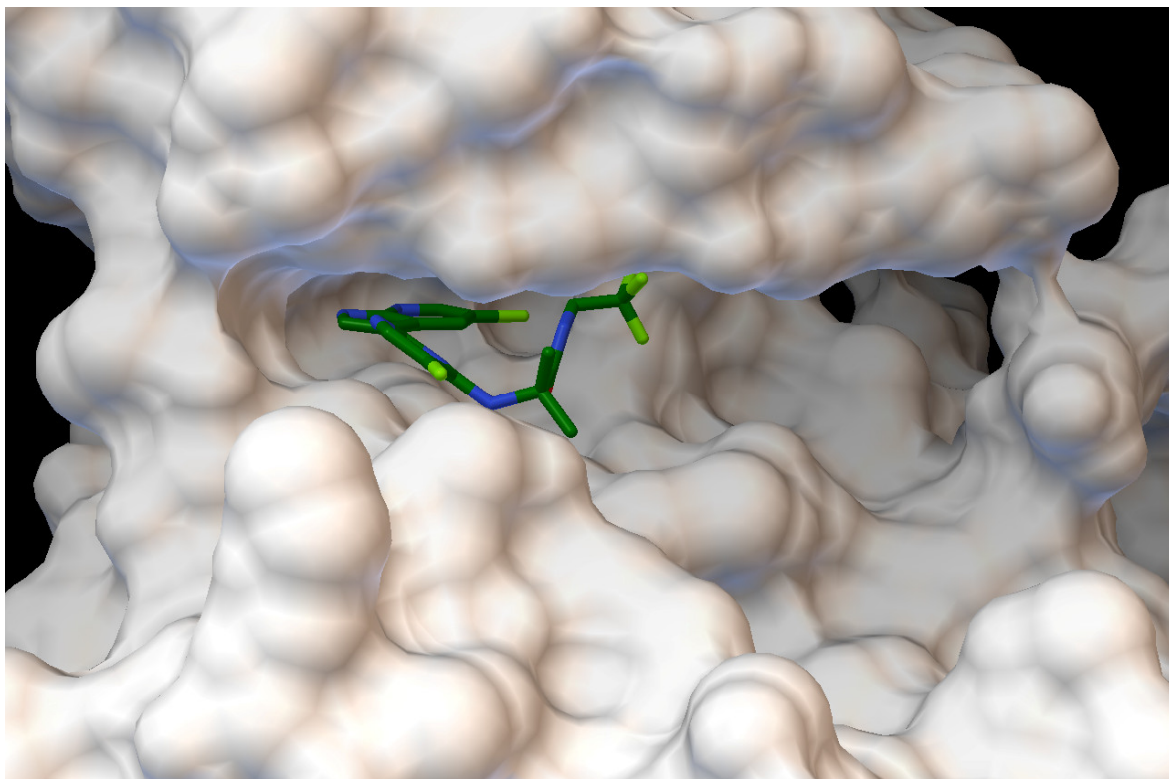

**Figure S2.** JAK1: ligand binding site with KEV

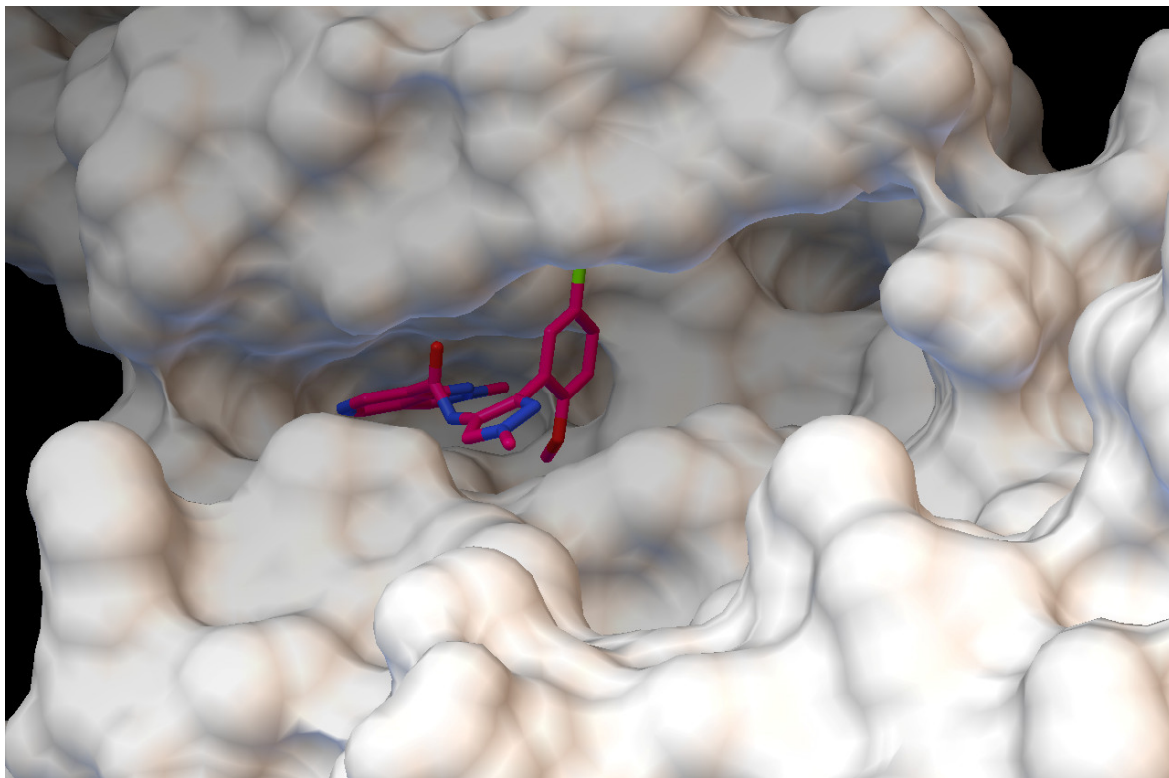

**Figure S3.** JAK1: ligand binding site with ruxolitinib

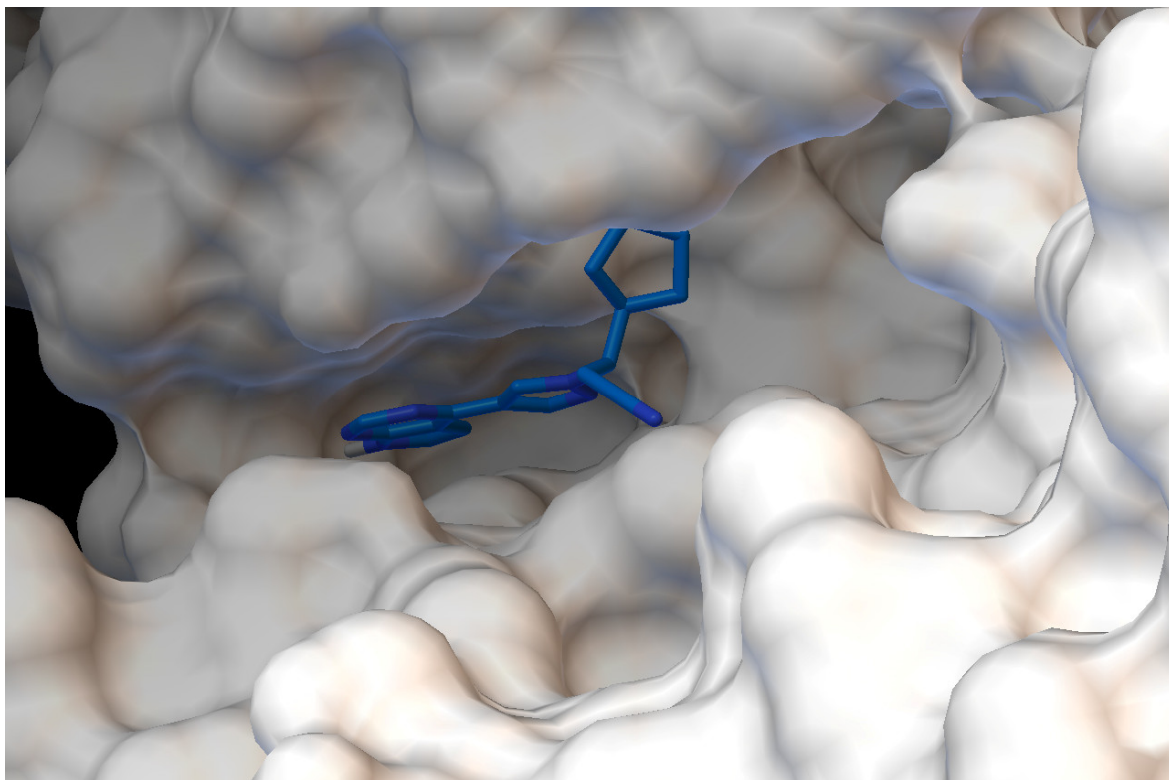

**Figure S4.** JAK2: ligand binding site with decernotinib

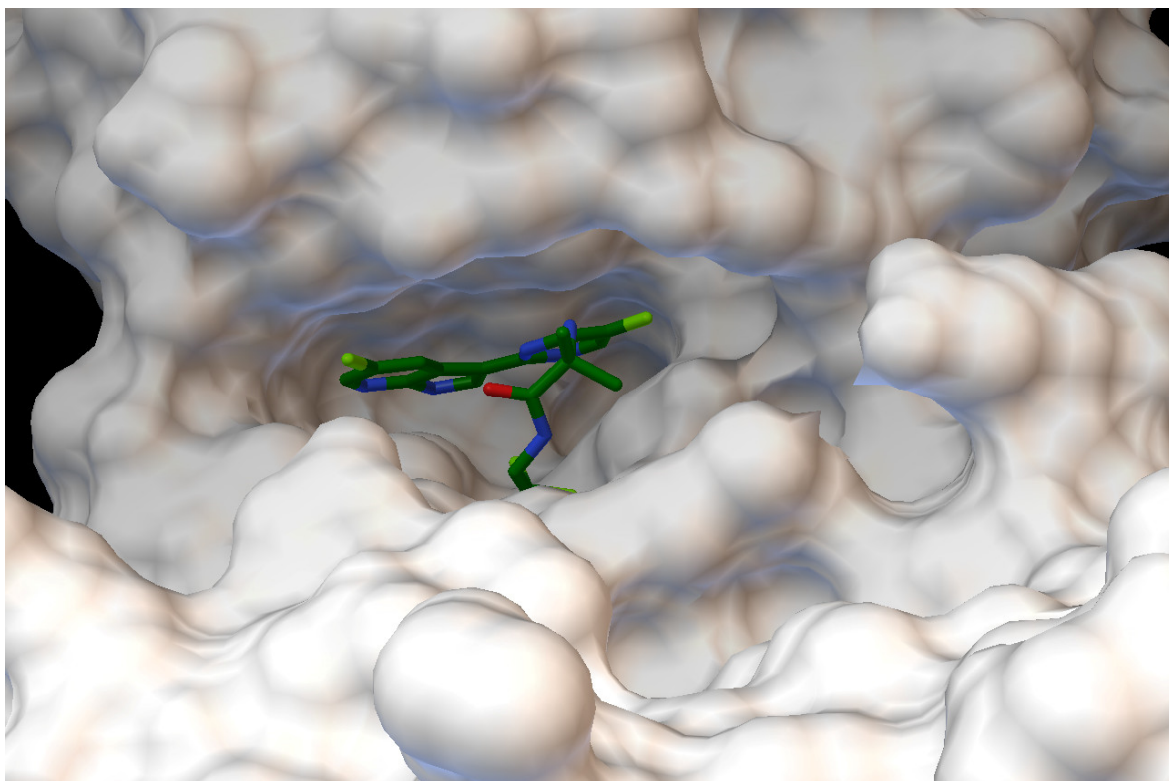



**Figure S5.** JAK2: ligand binding site with KEV

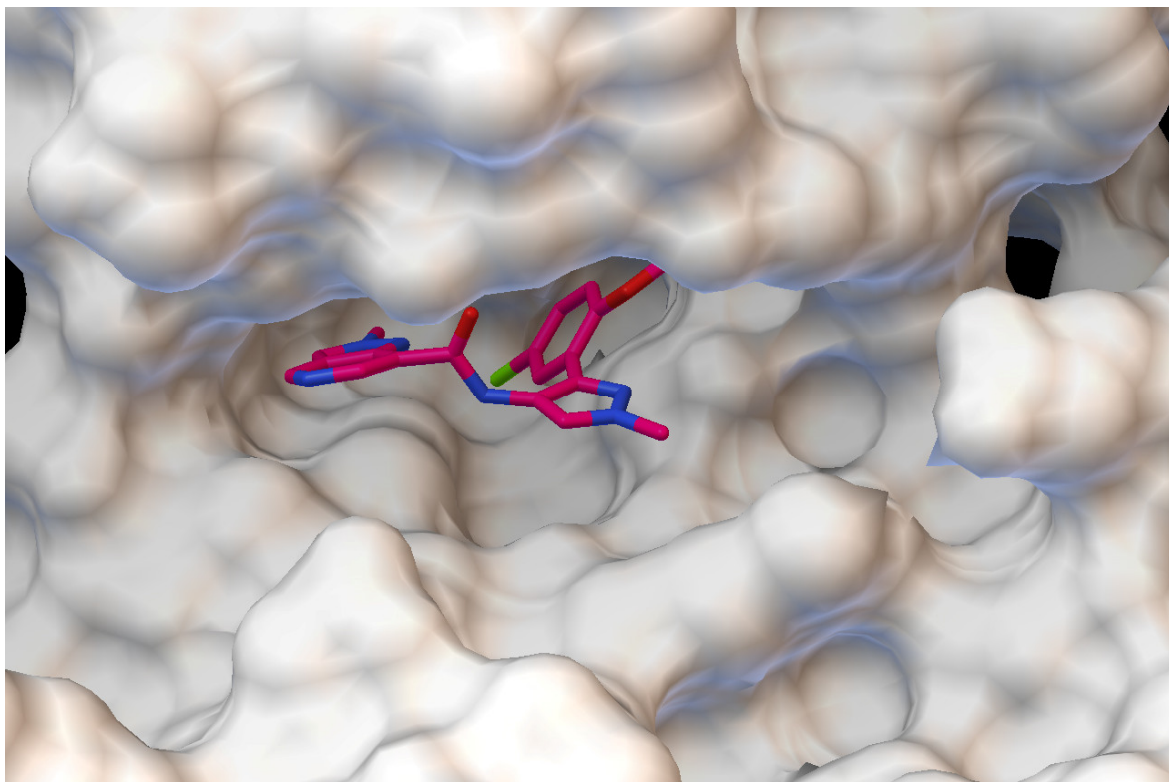

**Figure S6.** JAK2: ligand binding site with ruxolitinib

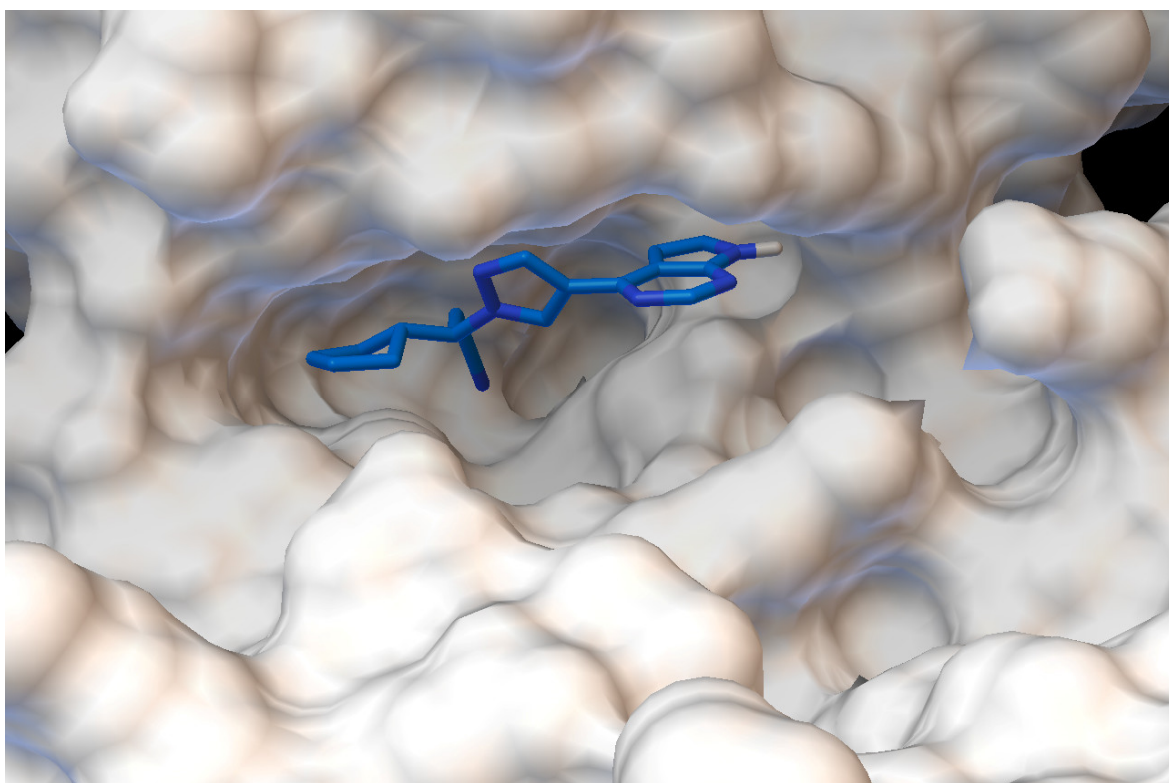

**Figure S7.** Interactions diagram of JAK1 kinase interactions with decernotinib

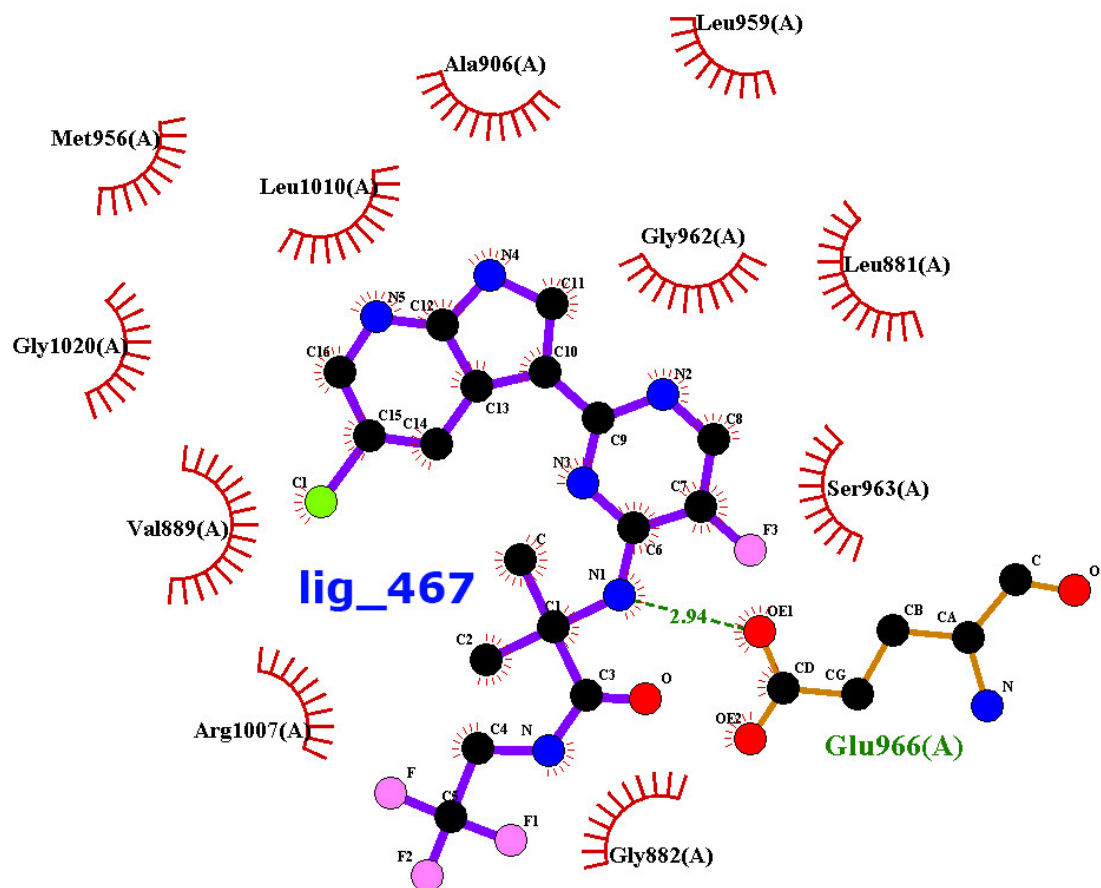

**lig\_467\_on\_6N7A\_pureA**

**Figure S8.** Interactions diagram of JAK1 kinase interactions with KEV

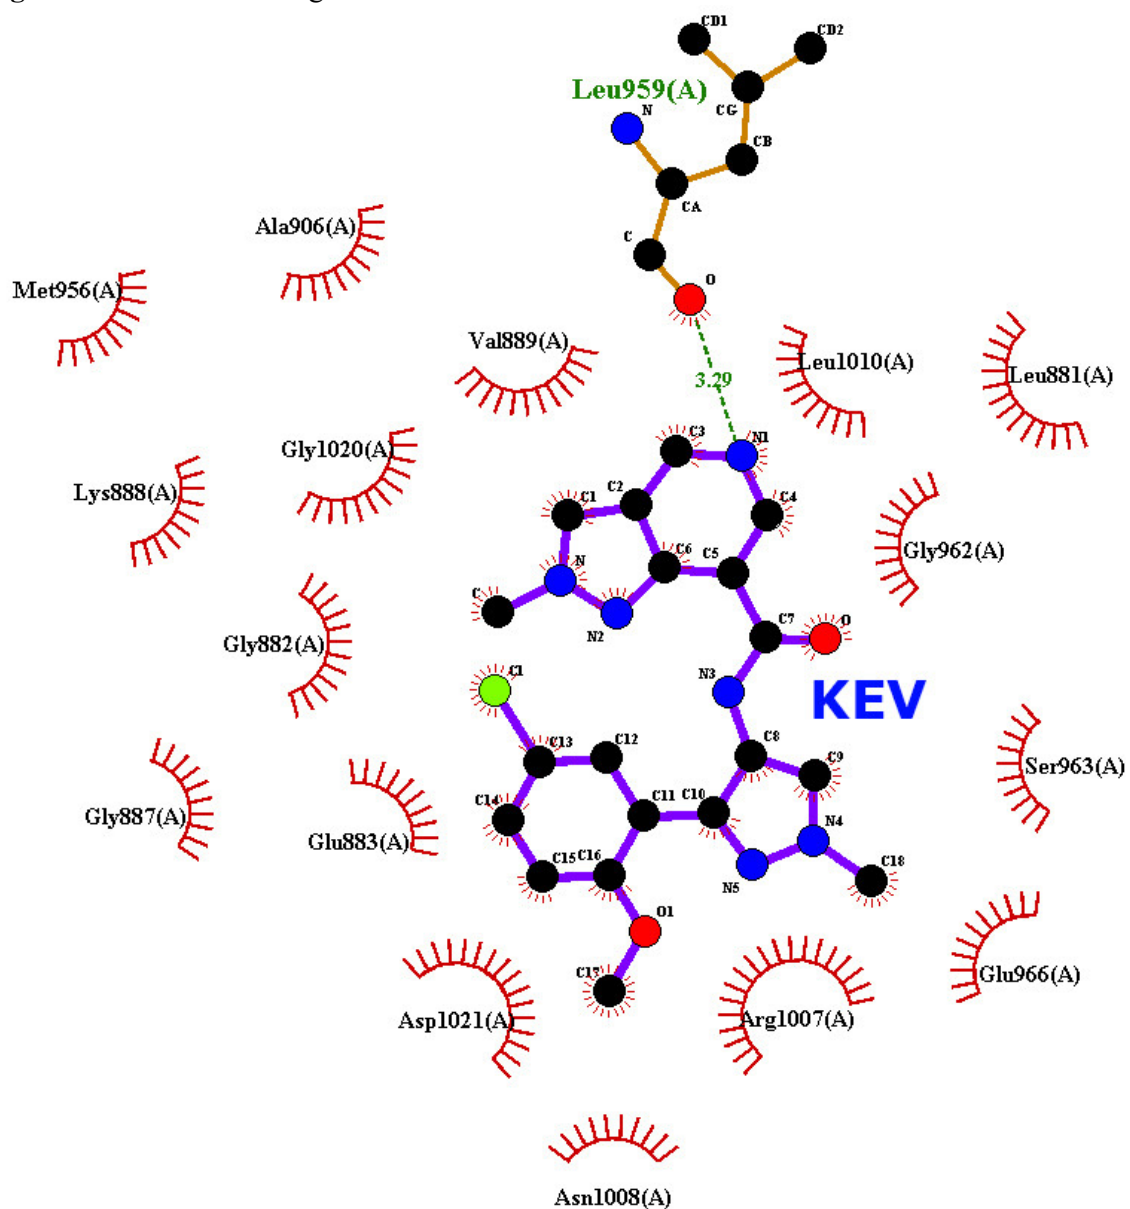

**lig\_KEV\_on\_6N7A\_pureA**

**Figure S9.** Interactions diagram of JAK1 kinase interactions with ruxolitinib

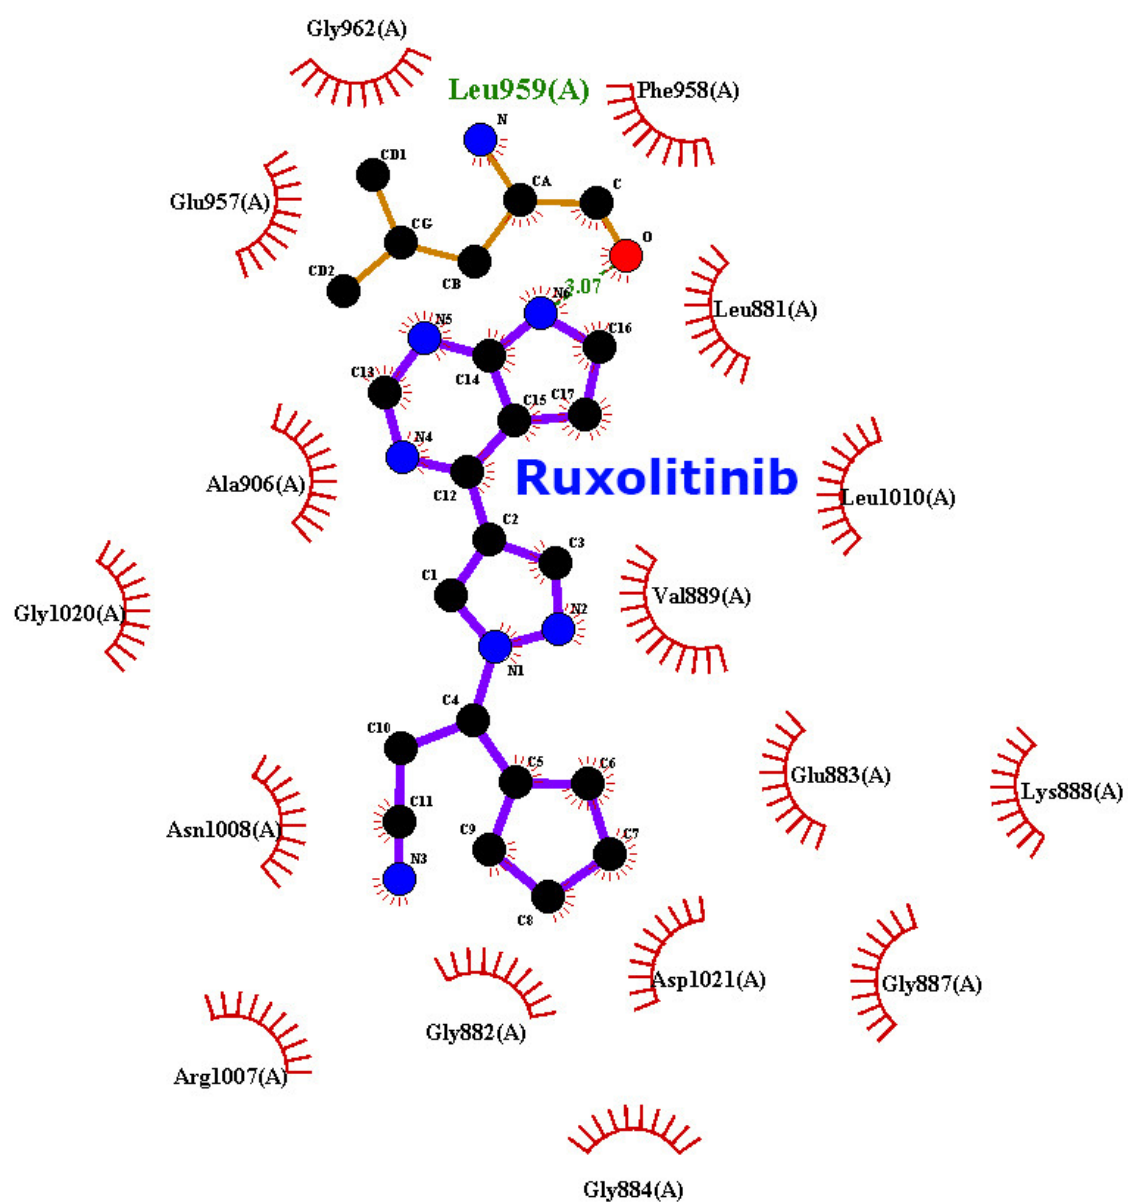

## Ruxolitinib\_on\_6N7A\_pureA

**Figure S10.** Interactions diagram of JAK2 kinases with decernotinib

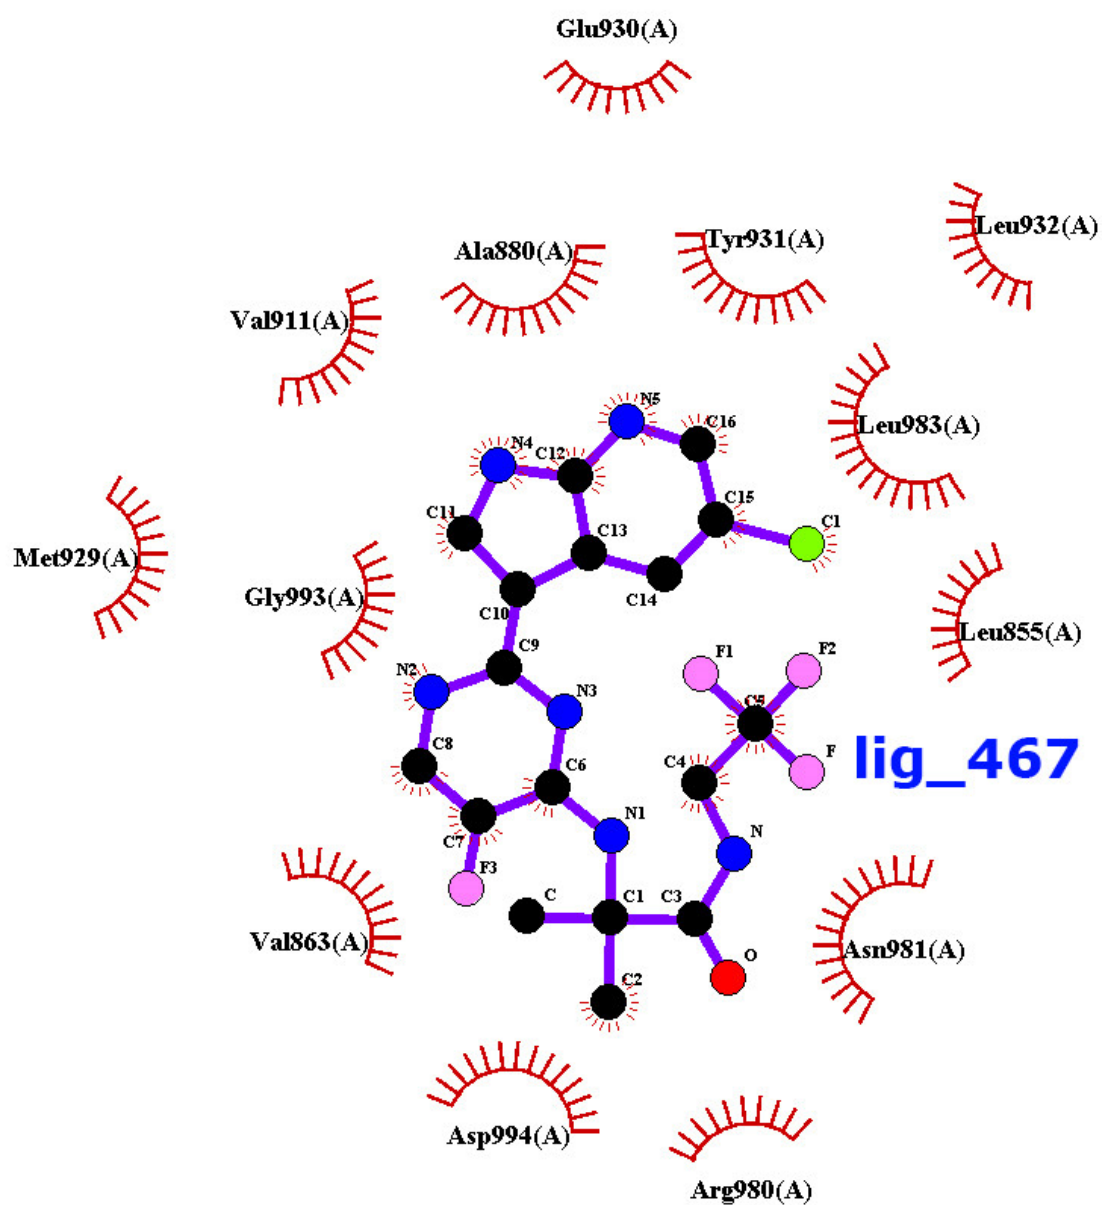

**lig\_467\_on\_4YTH\_pureA**

**Figure S11.** Interactions diagram of JAK2 kinases with KEV ligand

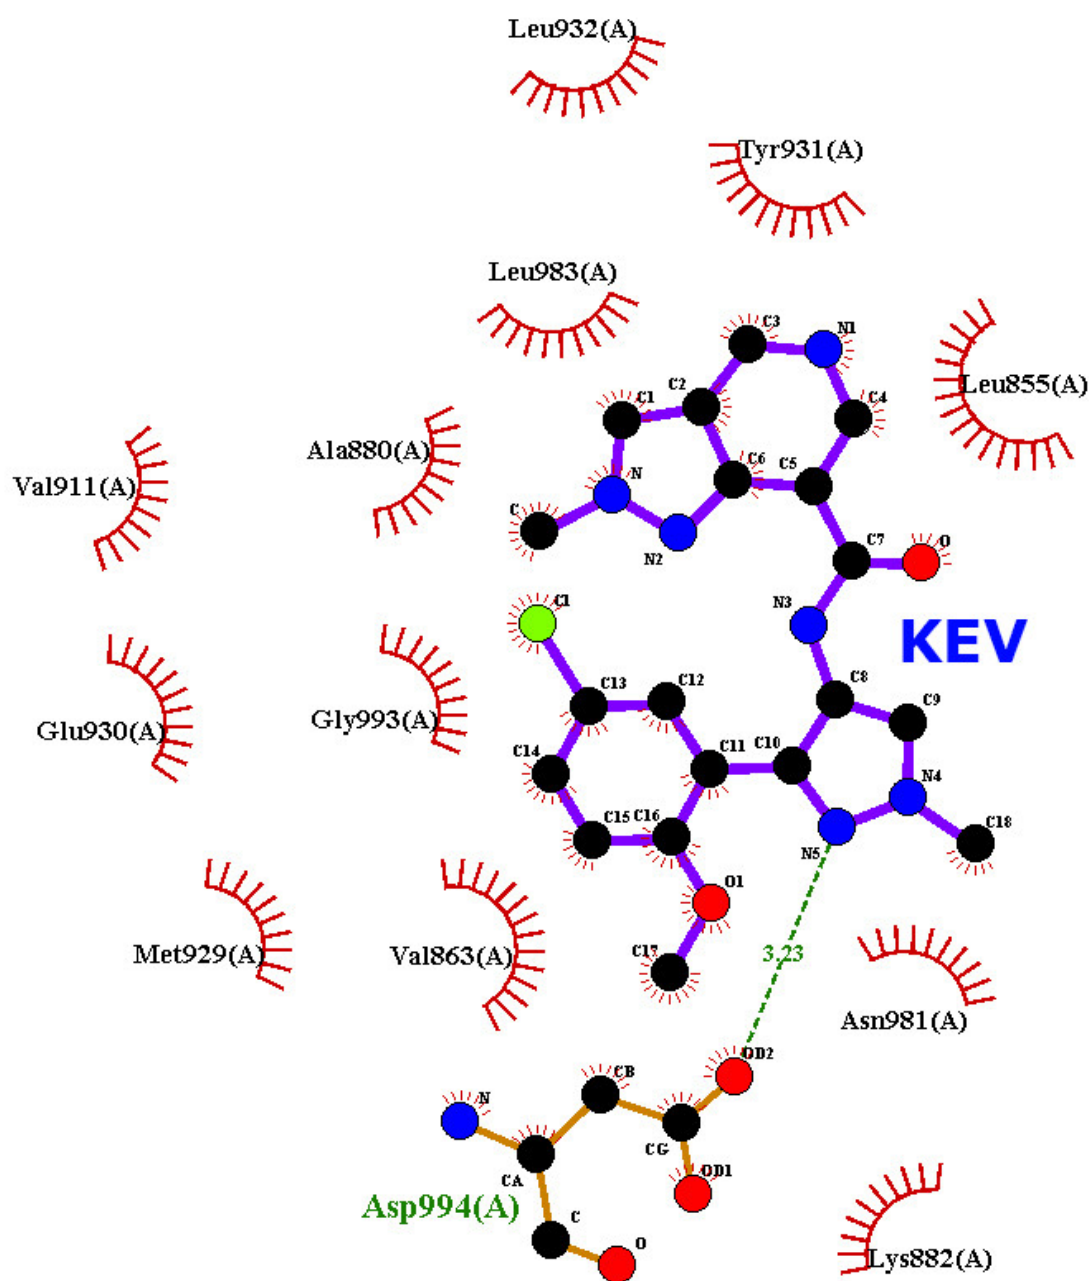

**lig\_KEV\_on\_4YTH\_pureA**



**Figure S12.** Interactions diagram of JAK2 kinases with ruxolitinib

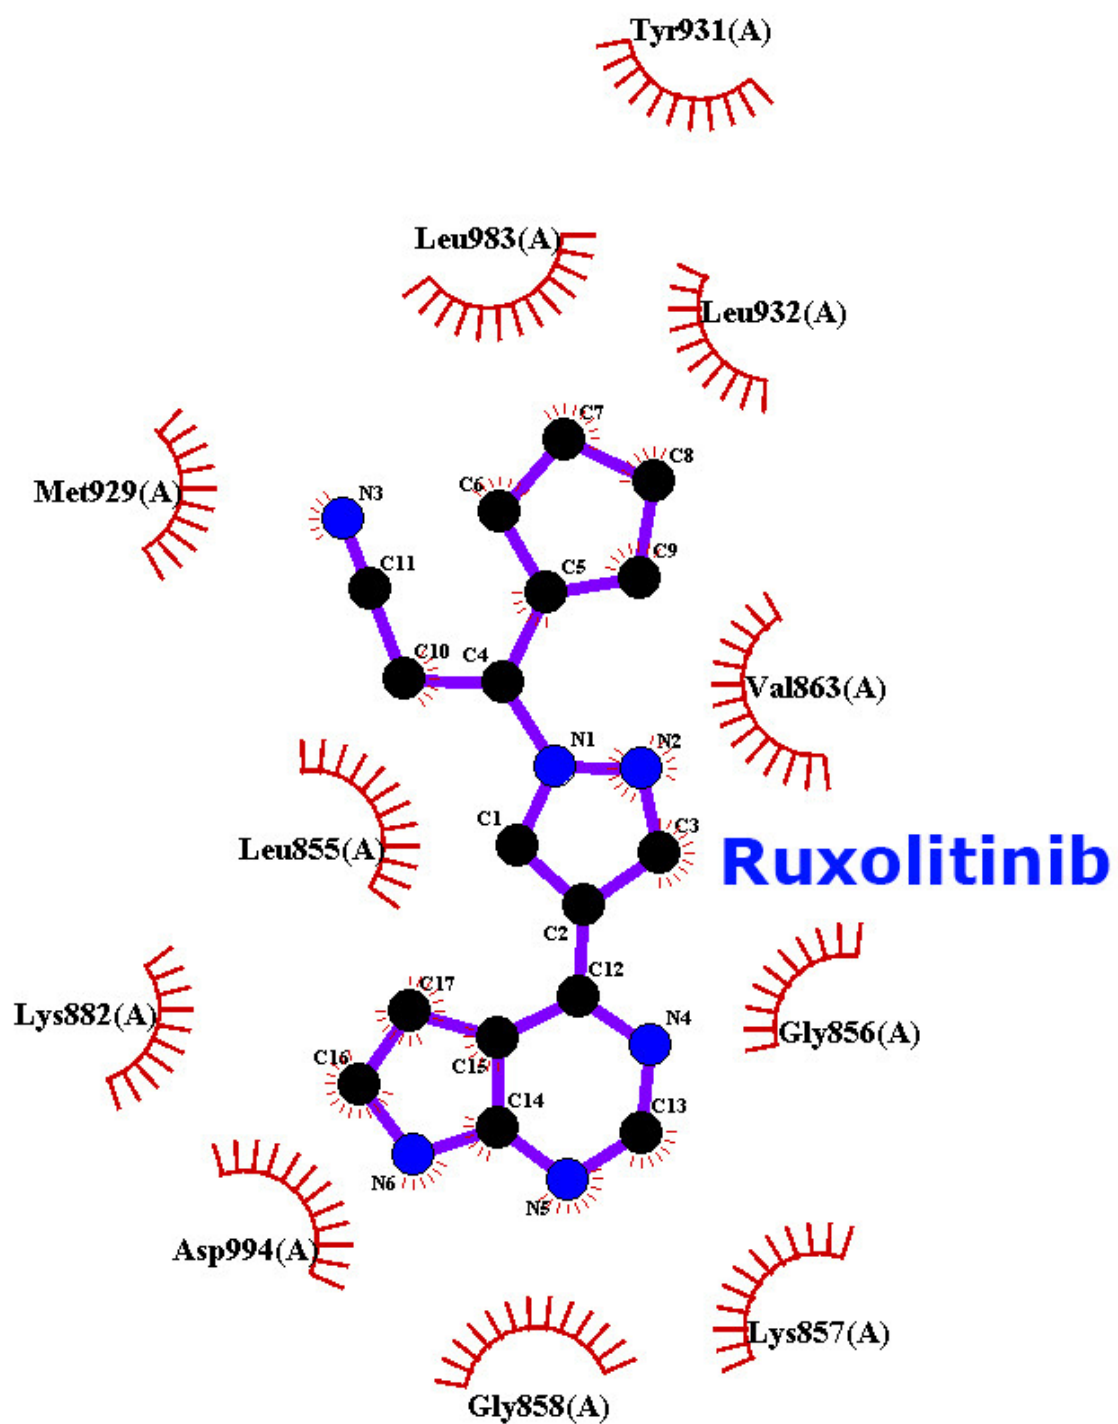

**Ruxo\_on\_4YTH\_pureA**
