# Supplementary material for: Atomic Simulation of the Binding of JAK1 and JAK2 with the Selective Inhibitor Ruxolitinib
Source: Int J Mol Sci. 2022 Sep 9;23(18):10466. doi: 10.3390/ijms231810466 (PMC9504736; doi:10.3390/ijms231810466)
Supplement: Supplementary file 1 [file ijms-23-10466-s001.zip › ijms-1889007-supplementary.xlsx]

## Sheet: Table S1
Ligand	JAK1 (6N7A)	Locus	JAK2 (4YTH)	Locus
Decernotinib	-8.7	ARG879, LEU881, GLY884, GLY962	-8.7	LEU855, GLY858, ARG980, LEU983
Ligand KEV	-8.7	ARG879, LEU881, GLY884, GLY962	-8.6	LEU855, GLY858, ARG980, LEU983
Ruxolitinib	-8.3	ARG879, LEU881, GLY884, GLY962	-8	LEU855, GLY858, ARG980, LEU983
JAK1
Ligand	ROUND-1	ROUND-2	ROUND-3	ROUND-4	ROUND-5
Decernotinib	-8.7	-8.8	-8.8	-8.6	-8.6
Ligand KEV	-8.7	-8.7	-8.7	-8.7	-8.7
Ruxolitinib	-8.3	-8.2	-8.3	-8.3	-8.2
JAK2
Ligand	ROUND-1	ROUND-2	ROUND-3	ROUND-4	ROUND-5
Decernotinib	-8.7	-8.7	-8.7	-8.8	-8.3
Ligand KEV	-8.6	-8.5	-8.5	-8.5	-8.5
Ruxolitinib	-8	-8	-8	-8	-8
